# Supplementary material
Source: publisher figshare collection journal article supplement (https://acs.figshare.com/ndownloader/files/3602469)
Supplement: Supplementary file 1 [file 3602469]

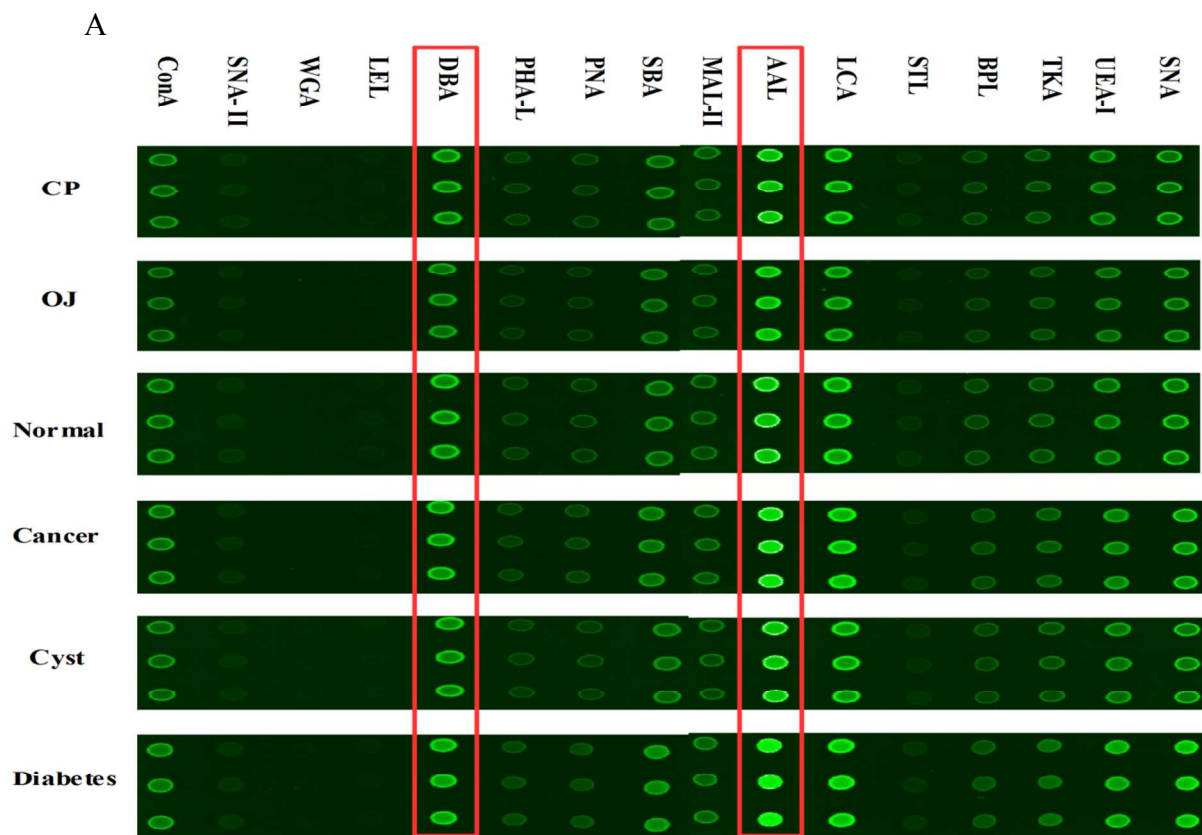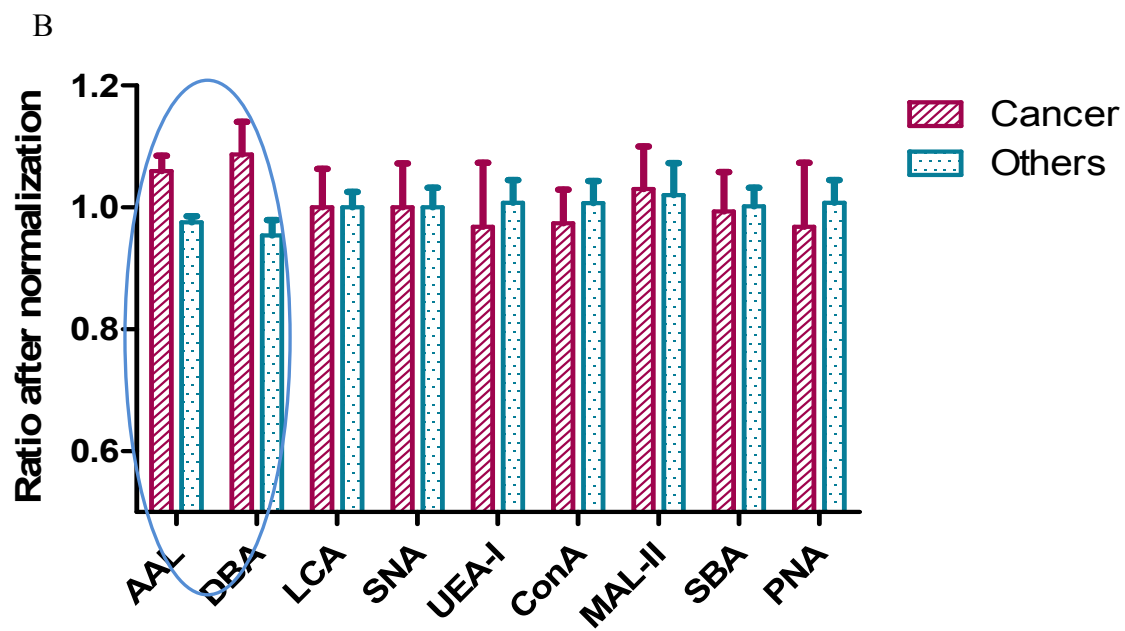

C

|              | ConA | MAL-II | SNA-II | AAL   | WGA | LCA   | LEL | STL  | DBA   | BPL  | PHA-L | TKA  | PNA  | UEA-I | SBA  | SNA   |
|--------------|------|--------|--------|-------|-----|-------|-----|------|-------|------|-------|------|------|-------|------|-------|
| Experiment 1 | 6457 | 2576   | 712    | 29541 | 106 | 14087 | 244 | 1312 | 8851  | 1904 | 1165  | 3154 | 1064 | 5757  | 6189 | 13335 |
| Experiment 2 | 7123 | 2907   | 666    | 31763 | 40  | 15625 | 177 | 978  | 10045 | 2021 | 1227  | 3147 | 1104 | 5904  | 6539 | 13516 |

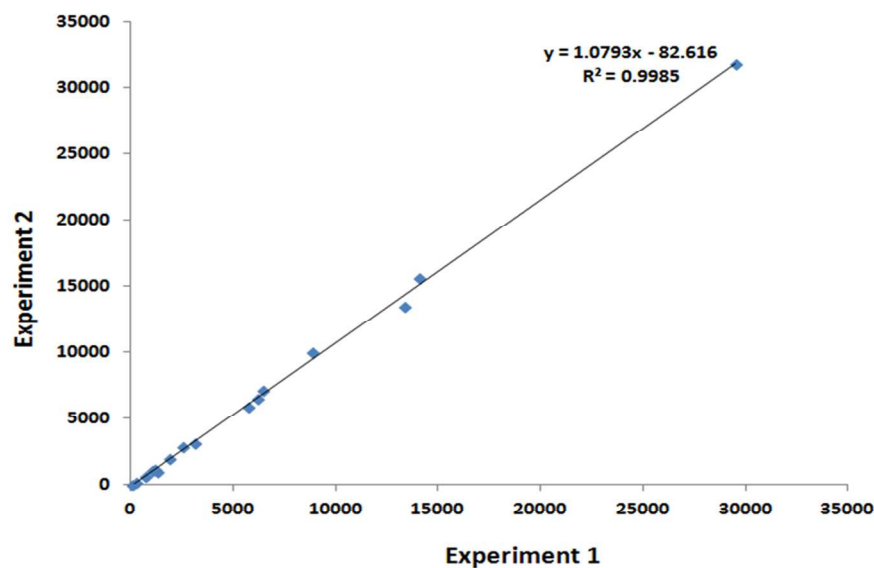

**Figure S1.** Overall glycosylation levels detected by lectin array. (A) 16 lectins were analyzed across 6 different group samples in 10 sets. Each lectin was analyzed in triplicate in each block. (B) The results of the eight strongest lectins plus PNA are shown. AAL ( $p$ -value=0.019) and DBA ( $p$ -value=0.032) lectins were found to differentiate pancreatic cancer samples from other control samples by statistic analysis. (C) The experimental reproducibility of lectin arrays. The same serum samples were incubated on two different lectin arrays. The signal intensity of lectin from 3 spots was averaged. The averaged signal intensity of each lectin in two different slides was plotted.
